# Supplementary material for: Separation behavior of hydrogen isotopes via water pervaporation using proton conductive membranes
Source: Royal Society of Chemistry journal article supplement (doi:10.1039/d4ew00330f), 2024-01-01
Supplement: d4ew00330f1.pdf [file d4ew00330f1.pdf]

## Supplementary Information

# Separation Behavior of Hydrogen Isotopes via Water Pervaporation using Proton Conductive Membranes

*Chan Woo Park,<sup>\*a</sup> Sung-Wook Kim,<sup>a</sup> Hyung-Ju Kim,<sup>a</sup> Euna Jeong,<sup>a, b</sup> In-Ho Yoon<sup>a</sup>*

<sup>a</sup>Decommissioning Technology Division, Korea Atomic Energy Research Institute, 989-111  
Daedeok-daero, Yuseong-gu, Daejeon 34057, Republic of Korea

<sup>b</sup>Department of Chemical Engineering, Chungnam National University, 99 Daehak-ro,  
Yuseong-gu, Daejeon 34134, Republic of Korea

## ESI 1. Through-plane proton conductivity

The proton conductivity of the fully hydrated membrane was evaluated using a ZIVE SP2 instrument (WonA Tech, South Korea) through electrochemical impedance analysis. This analysis was conducted using a custom-made through-plane conductivity cell equipped with platinum electrodes (active area:  $1 \times 1 \text{ cm}^2$ ). The fully hydrated membrane was placed between platinum electrodes held by a Teflon holder, and the entire assembly was then immersed in deionized water. The membrane's resistance was measured by identifying the intercept of the high-frequency impedance with the real axis at  $25 \text{ }^\circ\text{C}$ . Specific conductivity ( $\sigma$ ) was calculated based on the membrane's thickness ( $L$ ) and the measurement area ( $A$ ) using the following formula.

$$\sigma (\text{S}\cdot\text{cm}^{-1}) = L/(R\cdot A)$$

## ESI 2. Tensile test

The tensile test of the membrane was conducted using a universal testing machine (Qmesys, South Korea) at ambient conditions. The membrane was prepared by air drying before the measurements. Both ends of the membrane specimen ( $40 \times 6 \text{ mm}^2$ ) were bonded with cardboard end tabs ( $10 \times 6 \text{ mm}^2$ ). The displacement was adjusted at a rate of 10 mm/min to obtain the stress-strain curves.

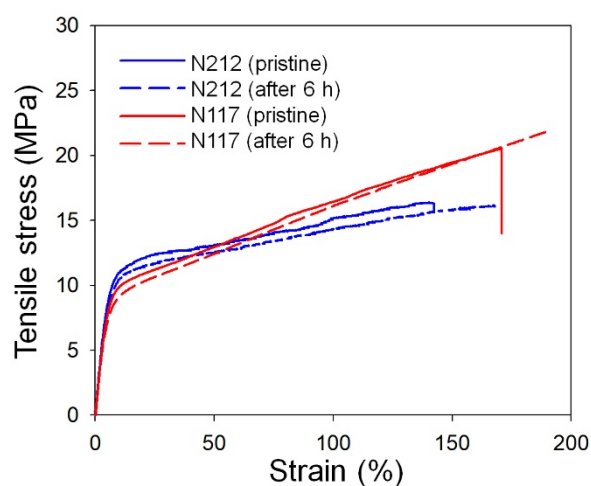

**Fig. S1.** Tensile stress-strain curves of dried N212 and N117 membranes measured at ambient conditions before and after the water pervaporation test, conducted for 6 hours at 35°C.
